# Supplementary material for: A miniaturized microplasma excitation source coupled with photochemically induced volatile species generation as a cost-effective tool for in situ mercury pollution analyses
Source: Royal Society of Chemistry journal article supplement (doi:10.1039/d4ja00306c), 2024-01-01
Supplement: d4ja00306c1.pdf [file d4ja00306c1.pdf]

## Supplementary information

### A miniaturized microplasma excitation source coupled with the photochemically-induced volatile species generation as a cost-effective tool for *in situ* mercury pollution analyses

Tymoteusz Klis, Pawel Pohl, Anna Dzimitrowicz, Piotr Jamroz\*

Department of Analytical Chemistry and Chemical Metallurgy, Faculty of Chemistry, Wrocław University of Science and Technology, Wybrzeże Stanisława Wyspiańskiego 27, 50-370 Wrocław, Poland

(\* corresponding author: [piotr.jamroz@pwr.edu.pl](mailto:piotr.jamroz@pwr.edu.pl), phone/fax +48 71 320 38 07)

#### Characterization of the UV radiation source

The emission spectra of the PURITEC HNS S 9W UVC lamp (Osram) used in the photochemical vapour generation microreactor are shown in Fig. S1. The emission spectrum of the UV lamp was obtained with a 0.01 s integration time and 1800 grooves mm<sup>-1</sup> holographic gratings, using the same optical emission spectrometer (Andor SR500i) and CCD detector (Newton DU-920P-OE) as in the experiment.

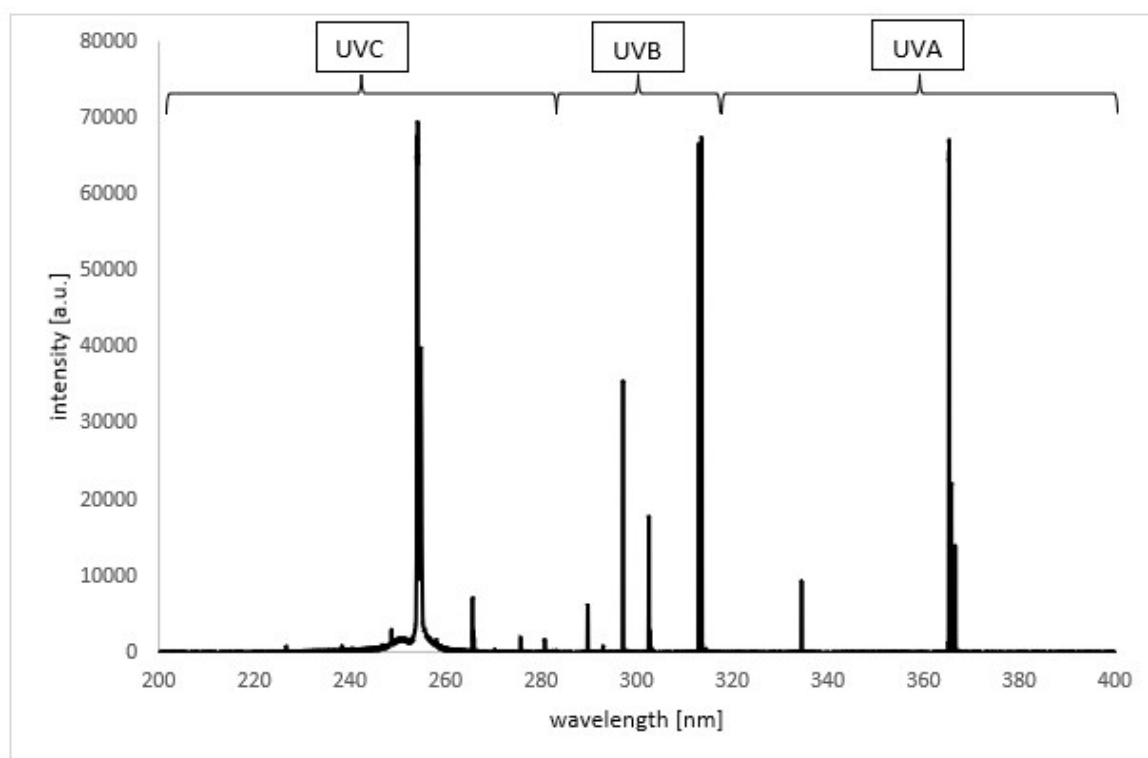

Fig. S1. The corrected emission spectra of the UV lamp used here (200-400 nm range )

In the UV region (Fig. S1), the most intense radiation is emitted in the UVC area (approximately 50%), followed by UVA (29%) and UVB (21%). The values are expressed as the sum of the measured intensities within each specific region relative to the total intensities of the emission bands and lines present in the spectrum.
